# Supplementary material
Source: MDPI journal article supplement (https://www.mdpi.com/2073-4441/15/19/3499)
Supplement: s1 [file s1]

## Supplementary information

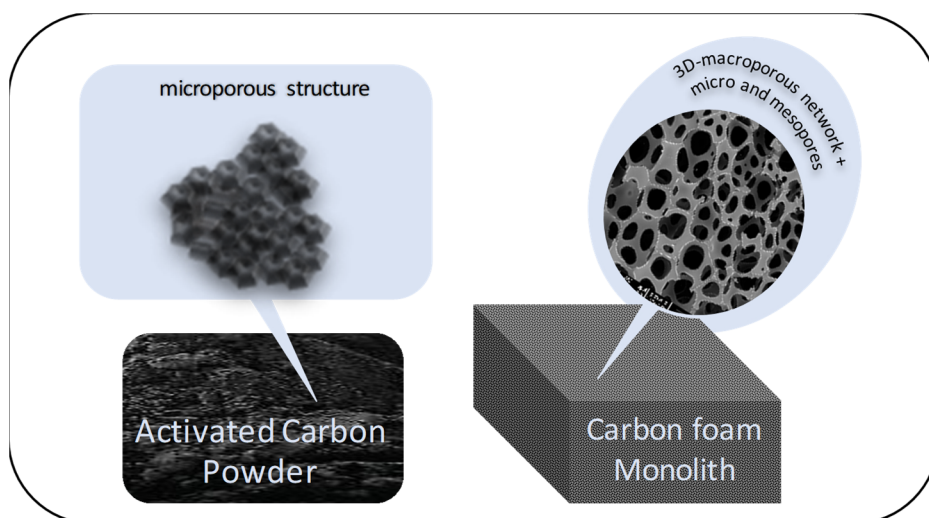

**Figure S1.** Structure of AC and SF highlighting the microporous and macroporous structure, respectively.

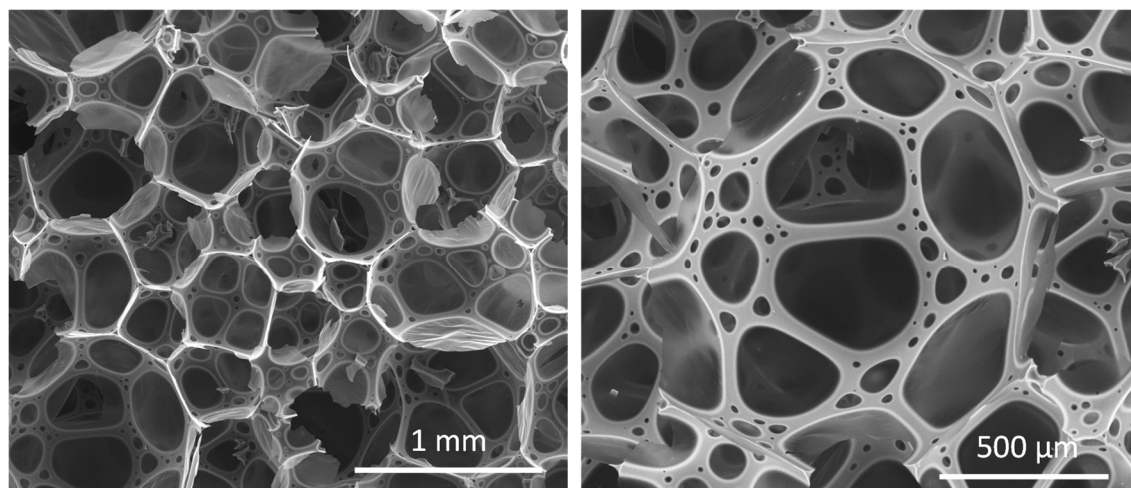

**Figure S2.** SEM images of SF.

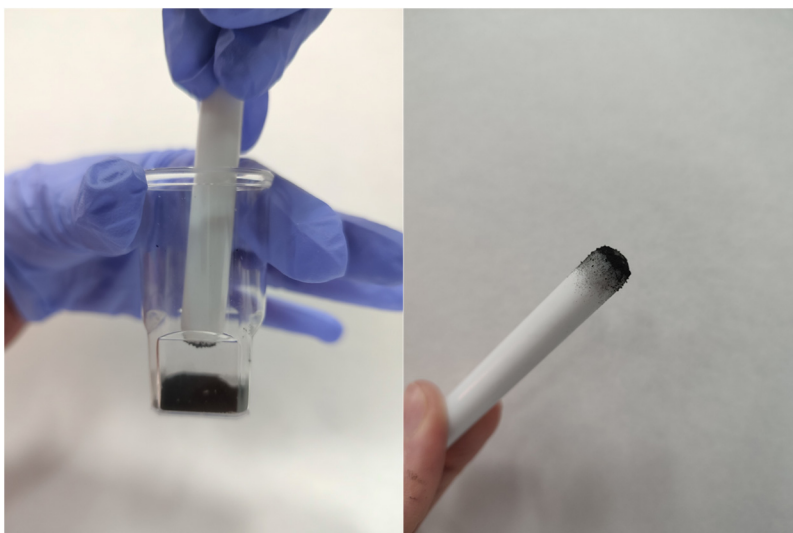

**Figure S3.** The magnetic property of ACFE-1.

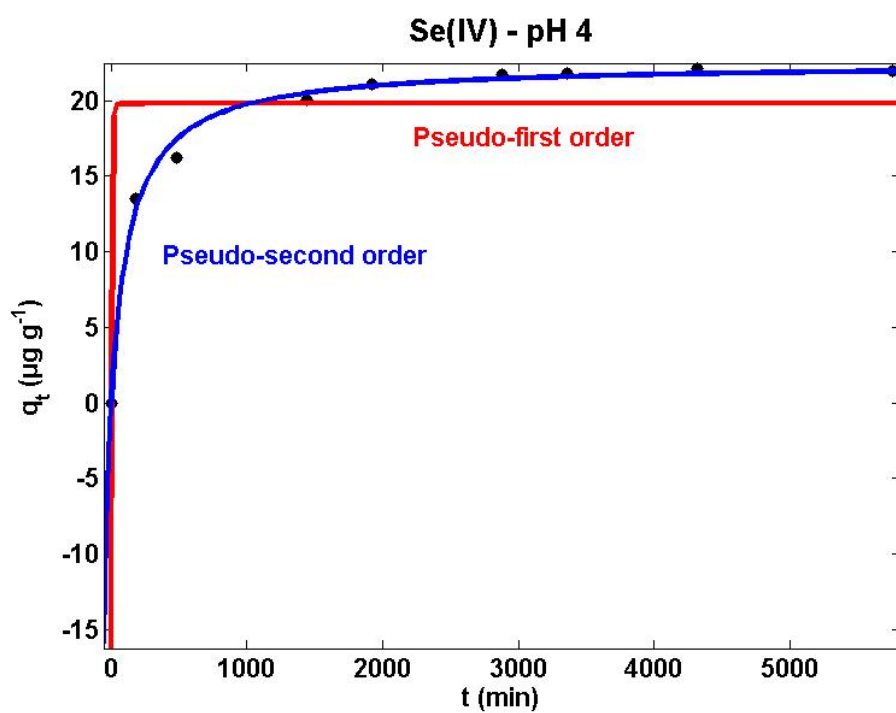

**Figure S4.** Removal of Se(IV) using ACFE-1 (initial concentration, 25 mg L<sup>-1</sup>; 10 g L<sup>-1</sup>; pH 4, 25 °C). Correlation with pseudo-first order and pseudo-second order kinetic models.

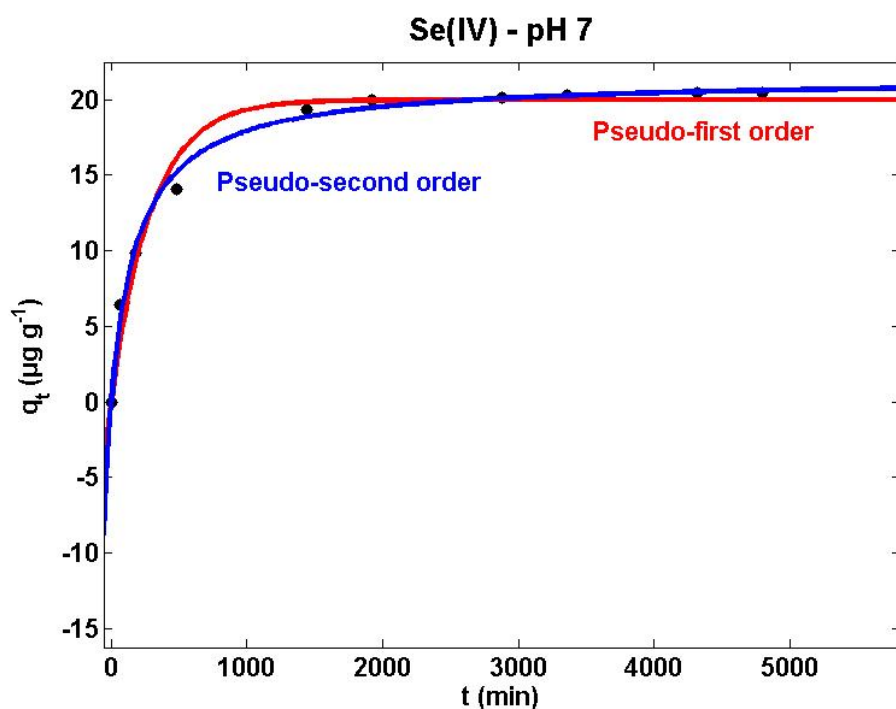

**Figure S5.** Removal of Se(IV) using ACFE-1 (initial concentration, 25 mg L<sup>-1</sup>; 10 g L<sup>-1</sup>; pH 7, 25 °C). Correlation with pseudo-first order and pseudo-second order kinetic models.

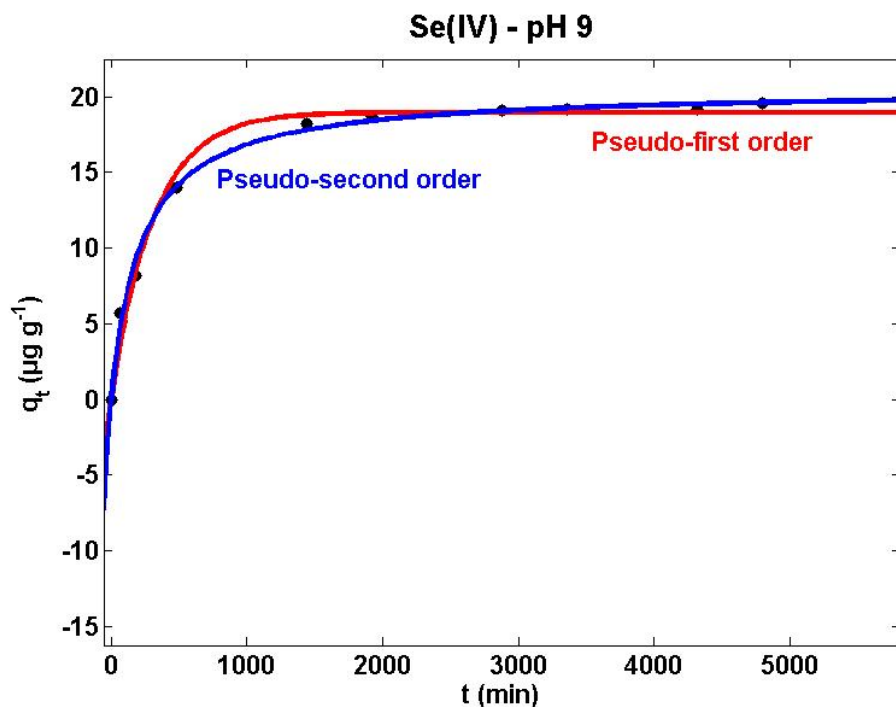

**Figure S6.** Removal of Se(IV) using ACFE-1 (initial concentration, 25 mg L<sup>-1</sup>; 10 g L<sup>-1</sup>; pH 9, 25 °C). Correlation with pseudo-first order and pseudo-second order kinetic models.

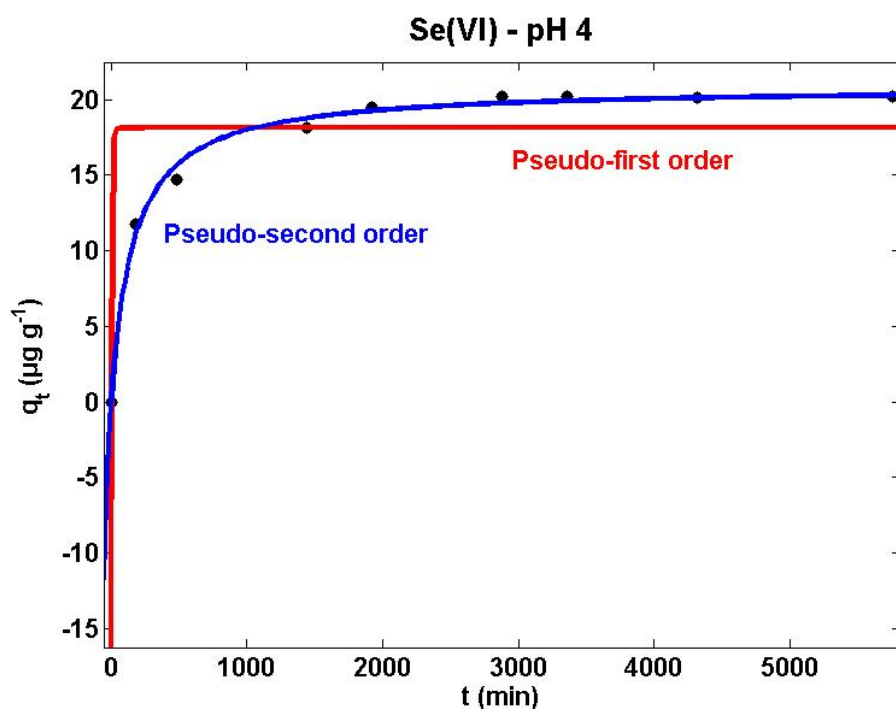

**Figure S7.** Removal of Se(VI) using ACFE-1 (initial concentration, 25 mg L<sup>-1</sup>; 10 g L<sup>-1</sup>; pH 4, 25 °C). Correlation with pseudo-first order and pseudo-second order kinetic models.

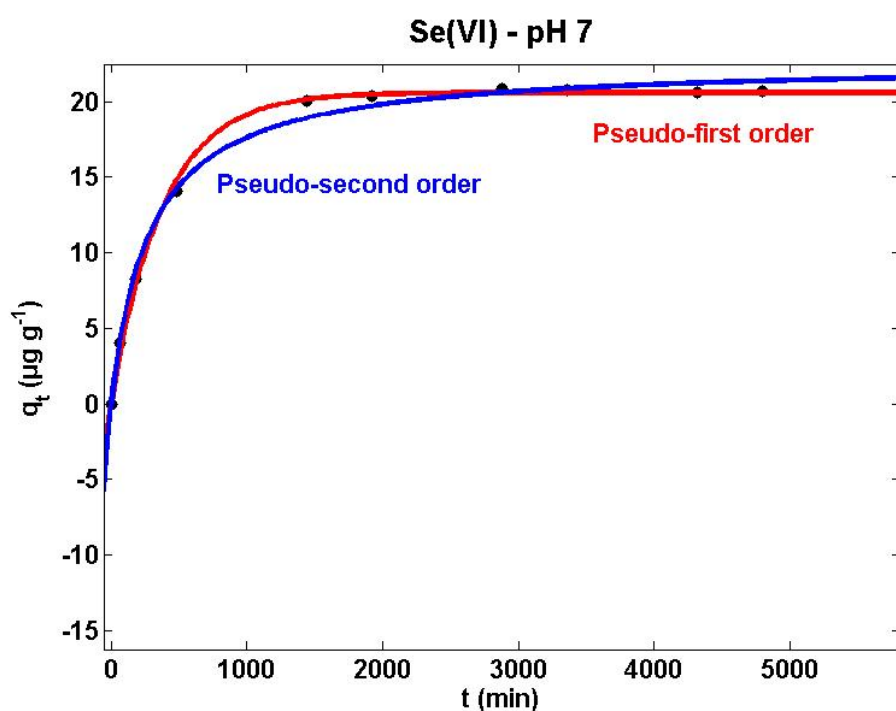

**Figure S8.** Removal of Se(VI) using ACFE-1 (initial concentration, 25 mg L<sup>-1</sup>; 10 g L<sup>-1</sup>; pH 7, 25 °C). Correlation with pseudo-first order and pseudo-second order kinetic models.

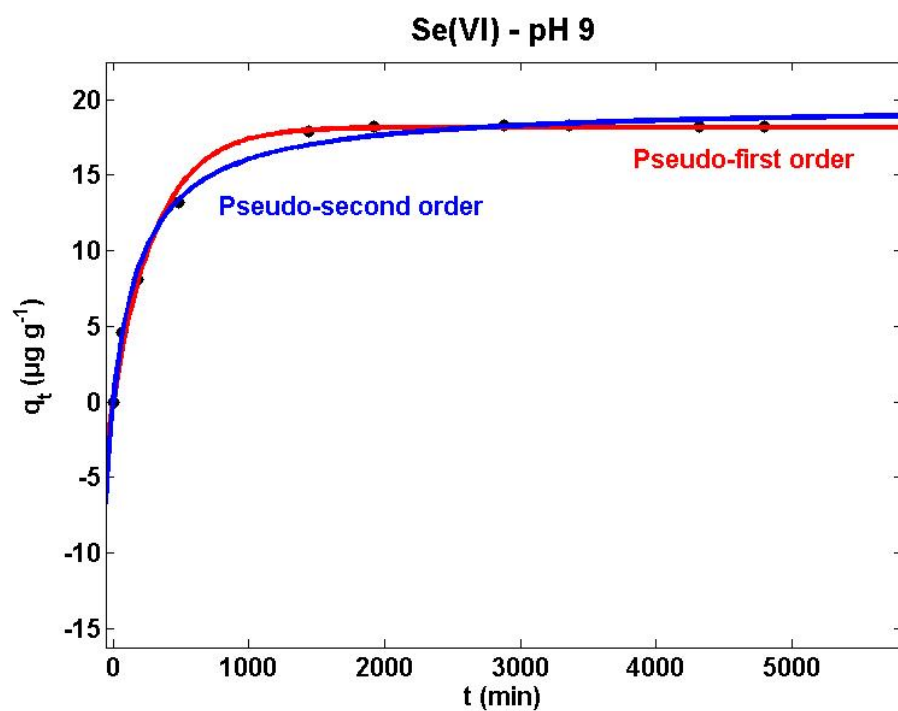

**Figure S9.** Removal of Se(VI) using ACFE-1 (initial concentration, 25 mg L<sup>-1</sup>; 10 g L<sup>-1</sup>; pH 9, 25 °C). Correlation with pseudo-first order and pseudo-second order kinetic models.
